# Supplementary material for: The UNAM-MARine Aerosol Tank (UNAM-MARAT): An Evaluation of the Ice-Nucleating Abilities of seawater from the Gulf of Mexico and the Mexican Pacific
Source: Copernicus journal article supplement (doi:10.5194/amt-2024-172), 2024-10-29
Supplement: Supplementary file 1 [file amt-2024-172-supplement.pdf]

1 SUPPLEMENTARY INFORMATION

2 **The UNAM-MARine Aerosol Tank (UNAM-MARAT): An Evaluation of the**  
3 **Ice-Nucleating Abilities of seawater from the Gulf of Mexico and the Mexican**  
4 **Pacific**

5 M. Fernanda Córdoba et al.

6 \*Corresponding author: [luis.ladino@atmosfera.unam.mx](mailto:luis.ladino@atmosfera.unam.mx)

7 Table S1. Coordinates of the sampling sites for the seawater samples for the UNAM-MARAT  
8 experiments.

| Sampling site | Collection date | Experiment date | Latitude     | Longitude    |
|---------------|-----------------|-----------------|--------------|--------------|
| BoA           | 19/10/21        | 22/10/21        | 16°50'37.2"N | 99°52'31.1"O |
| PoV           | 18/11/21        | 23/11/21        | 19°11'13.9"N | 96°7'10.8"O  |
| BoSM          | 09/04/22        | 10/04/22        | 19°05'40.0"N | 104°21'43"O  |
|               |                 | 25/04/22        |              |              |

9  
10 **Methodology for Determining Ice-Active Surface Site Density ( $n_s$ )**

11 The approach adopted in this study follows the methodology outlined by Si et al. (2018).  
12 Initially, the particle density at a specific relative humidity RH ( $\rho_{p,RH}$ ) was determined using  
13 Equation S\_E1. Subsequently, the x factor was computed according to Equation S\_E2, with  
14 particular consideration for marine aerosol particles. Equation S\_E3 was employed to  
15 calculate  $n_s$ , which requires both the particle size distribution measured by the LasAir device  
16 and the INP concentrations. The  $n_s$  values were determined for each sample (i.e., BoA, PoV,  
17 and BoSM), using the respective INP and particle concentrations.

18 **a) Calculation of the particle density at a given RH ( $\rho_{p,RH}$ )**

19 
$$\rho_{p,RH} = \rho_w + (\rho_{p,dry} - \rho_w) \frac{1}{gf^3} \quad (\text{S\_E1})$$

20 where  $\rho_w$  is the density of water and  $\rho_{p,dry}$  is the density of the dry particles.  $1.87 \text{ g cm}^{-3}$   
21 was used for marine aerosol (Si et al., 2018).  $gf^3$  is the hygroscopic growth factor. This  
22 factor was obtained from Ming and Russell (2001), using the mean relative humidity of  
23 95%. The aerosol particles were assumed to be composed of 30% of organic species.

24 **b) Calculation of the x factor.**

25 
$$x = gf \sqrt{\frac{\rho_{p,RH}}{\chi \rho_0}} \quad (\text{S\_E2})$$

26 Where  $\chi$  the dynamic shape factor for a non-spherical particle shape (1 dimensionless),  
 27 and  $\rho_0$  the unit density of  $1 \text{ g cm}^{-3}$ .

28 **c) Calculation of  $n_s$  based on the geometric diameters at a given RH.**

29  
 30 
$$n_{s,ae,RH} = \frac{[INP]}{S_{tot,ae,RH}} = \frac{[INP]}{\pi x^2 D_{geo,dry}^2 N_{tot}} \quad (\text{S\_E3})$$

31 where  $[INPs]$  is the concentration of INP in  $L^{-1}$  for each temperature (i.e., to -20, -25, and  
 32 -30°C) and each MOUDI stage.  $S_{tot,ae,RH}$  is the total surface area based on the aerodynamic  
 33 diameter at the sampling RH, and  $N_{tot}$  is the total number of aerosol particles.

34  $D_{geo,dry}$  corresponds to the average diameter of each LasAir channel, as shown in Table  
 35 S2. In this case, it was only taken from 1 to 4 channels since the diameters are slightly  
 36 comparable with the diameters of the MOUDI stages.

37 Table S2. Summary of average diameters for each LasAir channel.

| LasAir channel | Diameter range ( $\mu\text{m}$ ) | $D_{geo,dry}$ ( $\mu\text{m}$ ) | $D_{geo,dry}$ (cm)   | $D_{geo,dry}^2$ ( $\text{cm}^2$ ) |
|----------------|----------------------------------|---------------------------------|----------------------|-----------------------------------|
| D1             | 0.3 – 0.5                        | 0.4                             | $4.0 \times 10^{-5}$ | $1.60 \times 10^{-9}$             |
| D2             | 0.5 – 1.0                        | 0.75                            | $7.5 \times 10^{-5}$ | $5.62 \times 10^{-9}$             |
| D3             | 1.0 – 5.0                        | 3.0                             | $3.0 \times 10^{-4}$ | $8.99 \times 10^{-8}$             |
| D4             | 5.0 – 10                         | 7.5                             | $7.5 \times 10^{-4}$ | $5.62 \times 10^{-7}$             |

38

39 The total number of particles ( $N_{tot}$ ) were those corresponding to the MOUDI sampling  
 40 period i.e., ten mins.

41 It is worth mentioning that when equation S\_E3 was applied, the concentration of  
 42 particles from channel 3 (obtained from the LasAir) was used with the INP concentration  
 43 found in stages 3, 4, and 5 from de MOUDI.

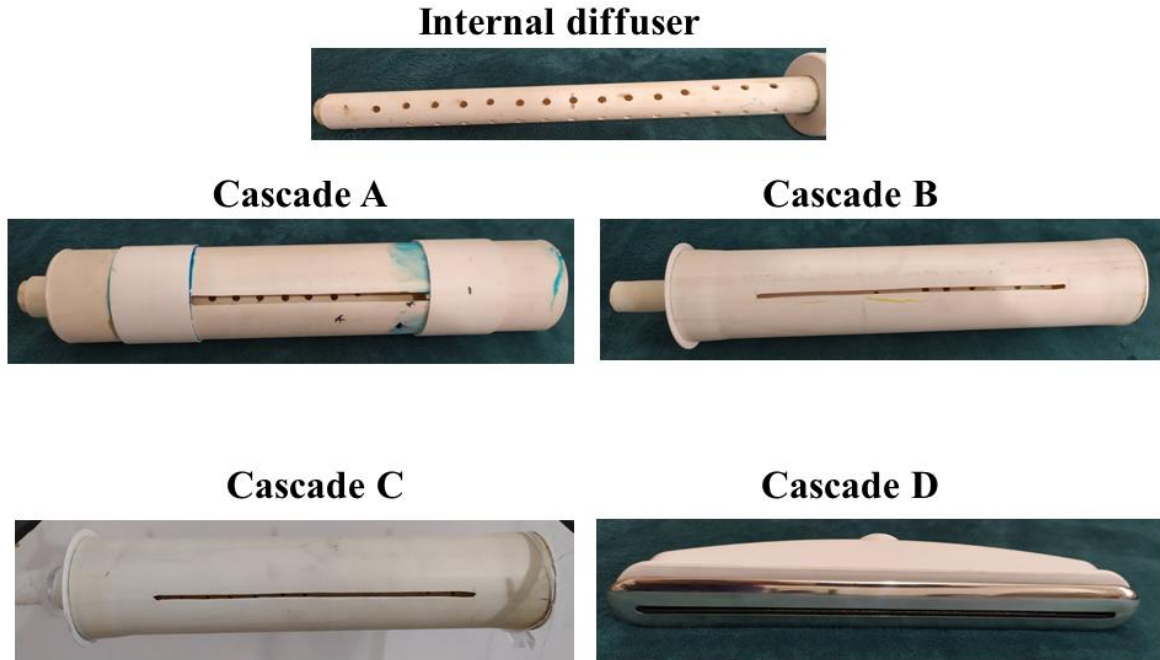

44

45

Figure S1. Examples of the homemade and the commercial cascades

46

Table S3. Characteristics of the cascades evaluated with the UNAM-MARAT.

| <b>Cascade</b>                                             | <b>A</b> | <b>B</b> | <b>C</b> | <b>D</b> |
|------------------------------------------------------------|----------|----------|----------|----------|
| <b>Number of experiments</b>                               | 12       | 12       | 12       | 12       |
| <b>Length of the slot (cm)</b>                             | 17.5     | 25.0     | 25.0     | 28.3     |
| <b>Width of the slot (mm)</b>                              | 7        | 4        | 4        | 2        |
| <b>Number of holes of the internal diffuser</b>            | 60       | 68       | 68       | 0        |
| <b>Diameter of the holes of the internal diffuser (mm)</b> | 7        | 7        | 5        | 0        |

47

48

49

50

51

52

Table S4. The  $n_s$  and  $T_{50}$  values for each sample as a function of particle size.

| Sampling site | Variable               | T (°C) | Size (µm) |           |           |           |            |             |            |
|---------------|------------------------|--------|-----------|-----------|-----------|-----------|------------|-------------|------------|
|               |                        |        | 10 - 5.6  | 5.6 - 3.2 | 3.2- 1.8  | 1.8 - 1.0 | 1.0 - 0.56 | 0.56 - 0.32 | 0.32- 0.18 |
| BoA           | ns (cm <sup>-2</sup> ) | -20    |           |           |           |           |            | 388221,9    | 1817430,1  |
|               |                        | -25    |           |           | 785518,3  | 1961801,6 | 4052158,8  | 8618167,6   | 14101551,1 |
|               |                        | -30    |           | 906,5     | 1460405,3 | 8904128,7 | 17600641,4 | 8618167,6   | 34047932,5 |
|               | T <sub>50</sub> (°C)   |        | -32,0     | -27,3     | -23,3     | -24,0     | -25,3      | -31,8       | -30,3      |
| PoV           | ns (cm <sup>-2</sup> ) | -20    |           |           |           |           | 869,0      |             |            |
|               |                        | -25    |           | 104,5     | 447,4     | 4642,6    | 4721,6     | 2300,0      | 3421,7     |
|               |                        | -30    |           | 846,3     | 2873,2    | 4642,6    | 4721,6     | 2300,0      | 29684,3    |
|               | T <sub>50</sub> (°C)   |        | -30,5     | -27,9     | -24,0     | -23,9     | -23,0      | -31,6       | -31,6      |
| BoSM 09/04/22 | ns (cm <sup>-2</sup> ) | -20    |           |           |           |           | 19,3       |             |            |
|               |                        | -25    |           |           | 134,4     |           | 281,6      | 178,3       | 950,1      |
|               |                        | -30    |           | 2600,0    | 578,9     |           | 281,6      | 178,3       | 950,1      |
|               | T <sub>50</sub> (°C)   |        | -26,6     | -23,0     | -21,8     | -23,5     | -27,8      | -29,9       | -28,8      |
| BoSM 25/04/22 | ns (cm <sup>-2</sup> ) | -20    |           |           |           | 24,5      | 22,4       |             |            |
|               |                        | -25    |           |           | 325,0     | 278,4     | 182,7      | 185,0       | 1253,9     |
|               |                        | -30    |           | 1698,0    | 1578,1    | 278,4     | 182,7      | 185,0       | 1253,9     |
|               | T <sub>50</sub> (°C)   |        | -25,5     | -23,5     | -22,5     | -23,5     | -24,1      | -25,0       | -24,5      |

53

54

55

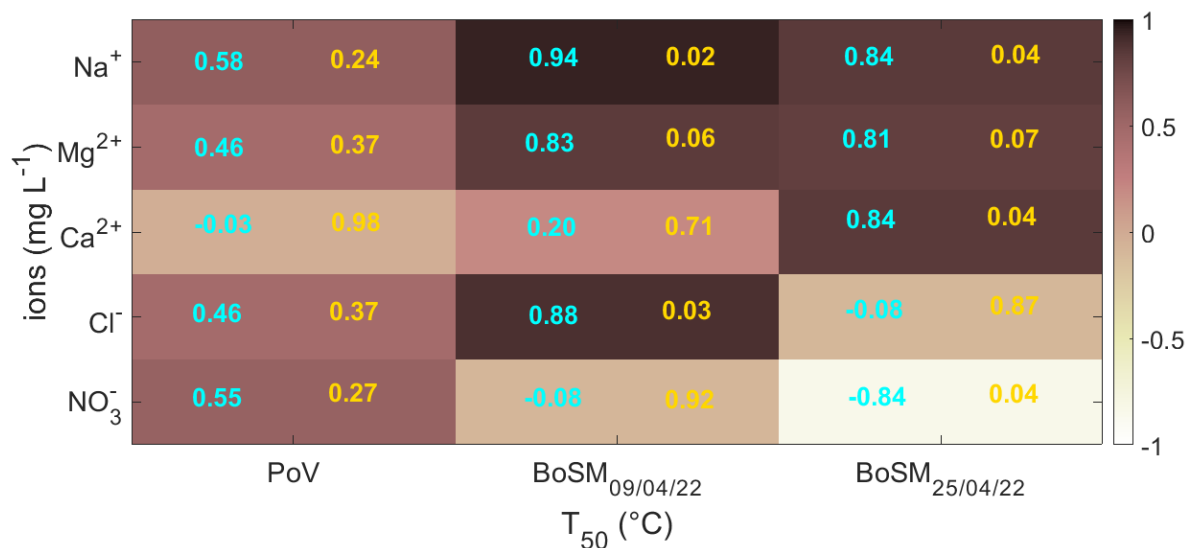

56

57 Figure S2. Correlation coefficients (blue numbers) and their respective p-values (yellow numbers,  
 58 considered significant if  $p < 0.05$ ). Darker and lighter colors indicate a positive and negative  
 59 correlation, respectively.

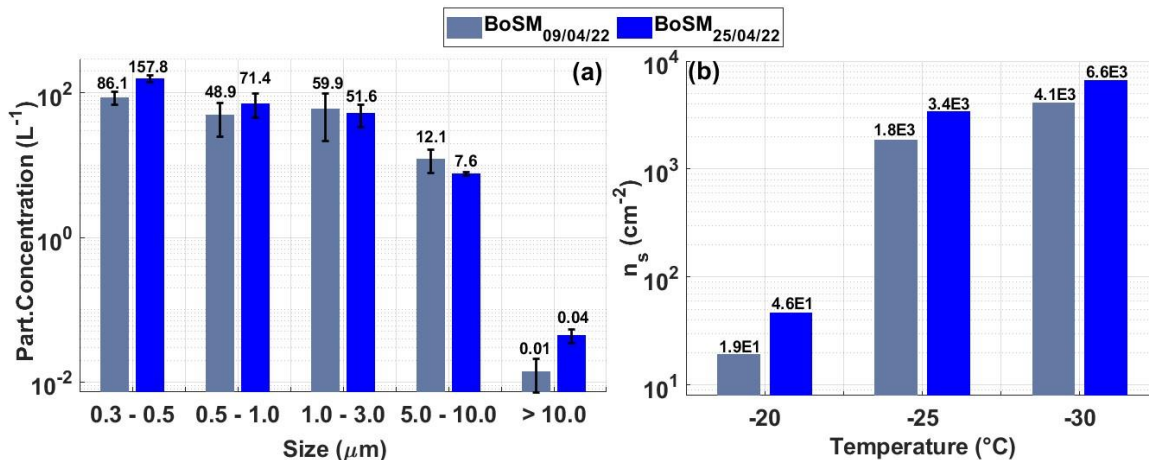

60

61 Figure S3. Analysis of transport and aging in the Manzanillo seawater samples (indicate here that  
 62 9/April is fresh and grey bars and 25/April is aged sample and blue bars). (a) Particle concentration  
 63 (L<sup>-1</sup>) as a function of size (μm) and (b) n<sub>s</sub> values as a function of temperature (°C)

#### 64 References

- 65 Ming, Y. and Russell, L. M.: Predicted hygroscopic growth of sea salt aerosol, *J. Geophys.*  
 66 *Res. Atmos.*, 106, 28259–28274, <https://doi.org/10.1029/2001JD000454>, 2001.
- 67 Si, M., Irish, V. E., Mason, R. H., Vergara-Temprado, J., Hanna, S. J., Ladino, L. A., Yakobi-  
 68 Hancock, J. D., Schiller, C. L., Wentzell, J. J. B., Abbatt, J. P. D., Carslaw, K. S., Murray, B.  
 69 J., and Bertram, A. K.: Ice-nucleating ability of aerosol particles and possible sources at three  
 70 coastal marine sites, *Atmos. Chem. Phys.*, 18, 15669–15685, [https://doi.org/10.5194/acp-18-](https://doi.org/10.5194/acp-18-15669-2018)  
 71 15669-2018, 2018.
